# Supplementary material for: Changes in Diversity and Community Composition of Root Endophytic Fungi Associated with Aristolochia chilensis along an Aridity Gradient in the Atacama Desert
Source: MDPI journal article supplement (doi:10.3390/plants11111511), 2022-06-05
Supplement: s1 [file s1]

## Supplementary materials

**Figure S1.** Rarefaction curve for fungal endophytes isolated from roots of *Aristolochia chilensis* collected in three locations: Huasco, Totoralillo and Quilimarí.

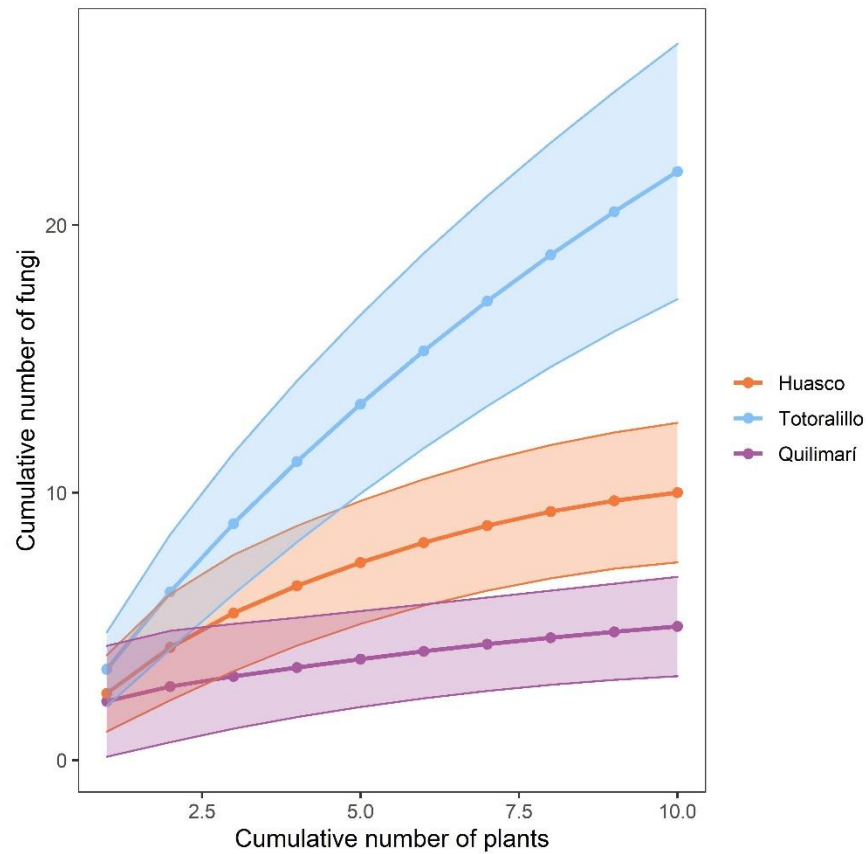

**Table S1.** Edaphic factors for three locations where *Aristolochia chilensis* was collected: Huasco (H), Totoralillo (T) and Quilimarí (Q). Values indicate the mean  $\pm$  SE. Statistical results correspond to a One-way ANOVA with post-hoc Tukey. Different letters indicate significant differences among locations. For soil water potential, values near to zero indicate higher water availability.

| Edaphic factors      | H                         | T                         | Q                           | d.f. | F    | p      |
|----------------------|---------------------------|---------------------------|-----------------------------|------|------|--------|
| Soil water potential | -27.8 $\pm$ 10.2 <b>a</b> | -4.26 $\pm$ 4.4 <b>b</b>  | -35.7 $\pm$ 20.2 <b>a</b>   | 2.27 | 11.1 | <0.001 |
| Soil moisture        | 1.51 $\pm$ 0.9 <b>a</b>   | 3.53 $\pm$ 0.9 <b>b</b>   | 2.44 $\pm$ 0.8 <b>a</b>     | 2.27 | 12.1 | <0.001 |
| pH                   | 7.97 $\pm$ 0.2 <b>a</b>   | 7.57 $\pm$ 0.5 <b>ab</b>  | 7.12 $\pm$ 0.7 <b>b</b>     | 2.27 | 5.77 | <0.01  |
| N                    | 54.7 $\pm$ 11.1 <b>a</b>  | 43.1 $\pm$ 15.8 <b>a</b>  | 49.7 $\pm$ 12.7 <b>a</b>    | 2.27 | 1.88 | 0.170  |
| P                    | 58.5 $\pm$ 21.9 <b>a</b>  | 14.7 $\pm$ 9.6 <b>b</b>   | 36.5 $\pm$ 14.5 <b>c</b>    | 2.27 | 18.3 | <0.001 |
| K                    | 328.5 $\pm$ 89.2 <b>a</b> | 204.4 $\pm$ 39.1 <b>b</b> | 264.6 $\pm$ 104.2 <b>ab</b> | 2.27 | 5.67 | <0.01  |
